# Supplementary material for: Taxonomy-Based Approaches to Quality Assurance of Ontologies
Source: Hindawi journal article supplement (doi:10.1155/2017/3495723), 2017-01-01
Supplement: f1 [file 3495723.f1.pdf]

**Supplementary Table 1**

| <b>NCIt Biological Process Concept</b> | <b># Role Types</b> | <b>Error</b>                                                                                                                                                                            |
|----------------------------------------|---------------------|-----------------------------------------------------------------------------------------------------------------------------------------------------------------------------------------|
| Excision Repair                        | 1                   | Missing the role Biological_Process_Has_Associated_Location with the target concept Chromosome                                                                                          |
| Expiration                             | 1                   | Missing the role Biological_Process_Has_Associated_Location with the target concept Lung                                                                                                |
| Homologous Recombination               | 1                   | Missing the role Biological_Process_Has_Associated_Location with the target concept Chromosome                                                                                          |
| Mismatch Repair                        | 1                   | Missing the role Biological_Process_Has_Associated_Location with the target concept Chromosome                                                                                          |
| Oncogene Activation Process            | 1                   | Missing the role Biological_Process_Has_Associated_Location with the target concept Chromosome                                                                                          |
| Recombination Repair                   | 1                   | Missing the role Biological_Process_Has_Associated_Location with the target concept Chromosome                                                                                          |
| Tumor Immunity                         | 1                   | The target of the role Biological_Process_Has_Result_Biological_Process Cancer Progression is incorrect                                                                                 |
| Epithelial Cell Proliferation          | 2                   | Missing the role Biological_Process_Has_Result_Anatomy with the target concept Epithelial Cell                                                                                          |
| Nervous System Development             | 2                   | Missing the role Biological_Process_Has_Associated_Location with the target concept Nervous System                                                                                      |
| Telomere Recombination                 | 2                   | Missing the role Biological_Process_Has_Associated_Location with the target concept Chromosome                                                                                          |
| Erythrocyte Differentiation            | 3                   | Missing the role Biological_Process_Has_Associated_Location with the target concept Bone Marrow                                                                                         |
| Leukocyte Differentiation              | 3                   | Missing the role Biological_Process_Has_Associated_Location with the target concept Bone Marrow                                                                                         |
| Leukopoiesis                           | 3                   | Missing the role Biological_Process_Has_Associated_Location with the target concept Bone Marrow                                                                                         |
| Megakaryocyte Differentiation          | 3                   | Missing the role Biological_Process_Has_Associated_Location with the target concept Bone Marrow                                                                                         |
| Megakaryopoiesis                       | 3                   | Missing the role Biological_Process_Has_Associated_Location with the target concept Bone Marrow<br>Missing the role Biological_Process_Has_Result_Anatomy with the target Megakaryocyte |
| Myeloid Cell Differentiation           | 3                   | Missing the role Biological_Process_Has_Associated_Location with the target concept Bone Marrow<br>Missing the role Biological_Process_Has_Result_Anatomy with the target Megakaryocyte |
| Myelopoiesis                           | 3                   | Missing the role Biological_Process_Has_Result_Anatomy with the target concept myelocyte                                                                                                |

| <b>NCIt Biological Process Concept</b>     | <b># Role Types</b> | <b>Error</b>                                                                                                                                                                                                         |
|--------------------------------------------|---------------------|----------------------------------------------------------------------------------------------------------------------------------------------------------------------------------------------------------------------|
| T-Cell Activation                          | 3                   | Missing the role Biological_Process_Has_Result_Biological_Process with the target concept T Cell Proliferation                                                                                                       |
| Thrombocyte Differentiation                | 3                   | Missing the role Biological_Process_Has_Associated_Location with the target concept Bone Marrow                                                                                                                      |
| Anaphase                                   | 4                   | The role Biological_Process_Is_Part_Of_Process with the target concept Cell Cycle Process is incorrect                                                                                                               |
| Antigen Presentation                       | 4                   | The role Biological_Process_Is_Part_Of_Process with the target concept Immune Response Process is incorrect                                                                                                          |
| Cell Cycle Regulation Process              | 4                   | The role Biological_Process_Is_Part_Of_Process with the target concept Cell Cycle Process is incorrect                                                                                                               |
| Chromosome Segregation                     | 4                   | The role Biological_Process_Is_Part_Of_Process with the target concept Cell Cycle Process is incorrect                                                                                                               |
| Cytokinesis                                | 4                   | The role Biological_Process_Is_Part_Of_Process with the target concept Cell Cycle Process is incorrect                                                                                                               |
| Metaphase Process                          | 4                   | The role Biological_Process_Is_Part_Of_Process with the target concept Cell Cycle Process is incorrect                                                                                                               |
| Mitosis                                    | 4                   | The role Biological_Process_Is_Part_Of_Process with the target concept Cell Cycle Process is incorrect                                                                                                               |
| Mitotic Chromosomal Process                | 4                   | The role Biological_Process_Is_Part_Of_Process with the target concept Cell Cycle Process is incorrect                                                                                                               |
| Mitotic Sister Chromatid Cohesion          | 4                   | The role Biological_Process_Is_Part_Of_Process with the target concept Cell Cycle Process is incorrect                                                                                                               |
| Negative Regulation of G0 to G1 Transition | 4                   | Missing the role Biological_Process_Has_Result_Biological_Process with the target concept G1 Phase Process<br>The role Biological_Process_Is_Part_Of_Process with the target concept Cell Cycle Process is incorrect |
| Negative Regulation of G1 Phase            | 4                   | The role Biological_Process_Is_Part_Of_Process with the target concept G1 Phase Process is incorrect                                                                                                                 |
| Negative Regulation of G2 Phase            | 4                   | The role Biological_Process_Is_Part_Of_Process with the target concept Cell Cycle Process is incorrect                                                                                                               |
| Negative Regulation of Mitosis             | 4                   | The role Biological_Process_Is_Part_Of_Process with the target concept Cell Cycle Process is incorrect                                                                                                               |
| Negative Regulation of S Phase             | 4                   | The role Biological_Process_Is_Part_Of_Process with the target concept Cell Cycle Process is incorrect                                                                                                               |
| Nuclear Division                           | 4                   | Missing the role Biological_Process_Has_Associated_Location with the target concept Nucleus                                                                                                                          |

| <b>NCIt Biological Process Concept</b>    | <b># Role Types</b> | <b>Error</b>                                                                                                   |
|-------------------------------------------|---------------------|----------------------------------------------------------------------------------------------------------------|
| Positive Regulation of Mitosis            | 4                   | The role Biological_Process_Is_Part_Of_Process with the target concept Cell Cycle Process is incorrect         |
| Prophase Process                          | 4                   | The role Biological_Process_Is_Part_Of_Process with the target concept Cell Cycle Process is incorrect         |
| S Phase Process                           | 4                   | The role Biological_Process_Is_Part_Of_Process with the target concept Cell Cycle Process is incorrect         |
| Sister Chromatid Exchange Process         | 4                   | The role Biological_Process_Is_Part_Of_Process with the target concept Cell Cycle Process is incorrect         |
| Negative Regulation of G1 to S Transition | 5                   | The role Biological_Process_Is_Part_Of_Process with the target concept G1 to S Transition Process is incorrect |
| Negative Regulation of G2 to M Transition | 5                   | The role Biological_Process_Is_Part_Of_Process with the target concept G2 to M Transition Process is incorrect |

**Supplementary Table 2**

| <b>NCIt Neoplasm Concept</b>       | <b>Error</b>                                                                                 |
|------------------------------------|----------------------------------------------------------------------------------------------|
| Benign Adrenal Medulla Neoplasm    | Missing the role Disease_Has_Finding with the target Indolent Clinical Course                |
| Benign Epithelial Neoplasm         | Missing the role Disease_Has_Finding with the target Benign Cellular Infiltrate              |
| Gangliocytoma                      | Missing the role Disease_Excludes_Finding with the target Poorly Differentiated Lesion       |
| Intramuscular Myxoma               | Missing the role Disease_Has_Finding with the target Hypocellular Tissue                     |
| Lymphoplasmacyte-Rich Meningioma   | Missing the role Disease_Has_Primary_Anatomic_Site with the target Meninges                  |
| Anal Canal Neuroendocrine Tumor    | Missing the role Disease_Has_Normal_Tissue_Origin with the target Neuroendocrine Tissue      |
| Benign Urethral Neoplasm           | Missing the role Disease_Has_Normal_Tissue_Origin with the target Connective and Soft Tissue |
| Cutaneous Glomangioma              | Missing the role Disease_Excludes_Abnormal_Cell with the target Malignant Cell               |
| Cervical Intraepithelial Neoplasia | Missing an IS-A link to the concept Premalignant Neoplasm                                    |

| <b>NCIt Neoplasm Concept</b>                                                       | <b>Error</b>                                                                                  |
|------------------------------------------------------------------------------------|-----------------------------------------------------------------------------------------------|
| Fibromatosis                                                                       | Missing the role Disease_Has_Primary_Anatomic_Site with the target Connective and Soft Tissue |
| Hemolymphangioma                                                                   | Missing the role Disease_Has_Associated_Anatomic_Site with the target Lymphatic Vessel        |
| High Grade Esophageal Squamous Intraepithelial Neoplasia                           | Missing the role Disease_Has_Finding with the target High Grade Lesion                        |
| Malignant Exocrine Pancreas Neoplasm                                               | Missing the role Disease_Excludes_Finding with the target concept Favorable Clinical Outcome  |
| Ampullary Noninvasive Pancreatobiliary Papillary Neoplasm with Low Grade Dysplasia | Missing the role Disease_Has_Finding with the target Low Grade Lesion                         |
| Benign Iris Neoplasm                                                               | Missing the role Disease_Has_Finding with the target Benign Cellular Infiltrate               |
| Borderline Ovarian Clear Cell Adenofibroma                                         | Missing the role Disease_Mapped_To_Gene with the target ARID1A Gene                           |
| Breast Carcinoma with Osseous Metaplasia                                           | Missing the role Disease_Has_Finding with the target Mixed Cellular Population                |
| Grade 2 Immature Ovarian Teratoma                                                  | Missing the role Disease_Has_Normal_Cell_Origin with the target Neuroepithelial Cell          |
| High Grade Vaginal Intraepithelial Neoplasia                                       | Missing the role Disease_Has_Primary_Anatomic_Site with the target Vagina                     |
| Invasive Hydatidiform Mole                                                         | Missing the role Disease_Has_Primary_Anatomic_Site with the target Uterus                     |
| Breast Tubular Adenoma                                                             | Missing an IS-A link to the concept Tubular Adenoma                                           |
| Gonadoblastoma                                                                     | Missing an IS-A link to the concept Neoplasm, Uncertain Whether Benign or Malignant           |
| Jugulotympanic Paraganglioma                                                       | Missing an IS-A link to the concept Neoplasm, Uncertain Whether Benign or Malignant           |
| Adenocarcinoma in Multiple Adenomatous Polyps                                      | Missing the role Disease_Has_Associated_Disease with the target Polyposis                     |
| Anterior Tongue Adenoid Cystic Carcinoma                                           | Missing the role Disease_Has_Finding with the target Slow Growing Mass                        |
| BCLC Stage B Hepatocellular Carcinoma                                              | Missing the role Disease_Has_Finding with the target Solid Growth Pattern                     |

| <b>NCIt Neoplasm Concept</b>                                     | <b>Error</b>                                                                                 |
|------------------------------------------------------------------|----------------------------------------------------------------------------------------------|
| BCLC Stage C Hepatocellular Carcinoma                            | Missing the role Disease_Has_Finding with the target Solid Growth Pattern                    |
| Granulosa Cell Tumor                                             | Missing the role Disease_Has_Normal_Cell_Origin with the target Granulosa Cell               |
| Hemangioendothelioma                                             | Missing an IS-A link to the concept Neoplasm, Uncertain Whether Benign or Malignant          |
| Acantholytic Squamous Cell Skin Carcinoma                        | Missing the role Disease_Excludes_Abnormal_Cell with the target Malignant Basaloid Cell      |
| Alveolar Rhabdomyosarcoma                                        | Missing the role Disease_Excludes_Primary_Anatomic_Site with the target Bone                 |
| Amelanotic Melanoma                                              | Missing the role Disease_Excludes_Finding with the target Favorable Clinical Outcome         |
| Benign Cecum Neoplasm                                            | Missing the role Disease_Has_Finding with the target Indolent Clinical Course                |
| Clear Cell Squamous Cell Skin Carcinoma                          | Missing an IS-A link to the concept Primary Malignant Neoplasm                               |
| Colon Carcinoma by AJCC v7 Stage                                 | Missing the role Disease_Excludes_Finding with the target Favorable Clinical Outcome         |
| High Grade Prostatic Intraepithelial Neoplasia                   | Missing the role Disease_Has_Finding with the target High Grade Lesion                       |
| High Grade Prostatic Intraepithelial Neoplasia, Inverted Variant | Missing the role Disease_Has_Finding with the target High Grade Lesion                       |
| Benign Buccal Mucosa Neoplasm                                    | Missing the role Disease_Has_Finding with the target Indolent Clinical Course                |
| Benign Floor of the Mouth Neoplasm                               | Missing the role Disease_Has_Normal_Tissue_Origin with the target Connective and Soft Tissue |
| Benign Hard Palate Neoplasm                                      | Missing the role Disease_Has_Finding with the target Benign Cellular Infiltrate              |
| Benign Posterior Tongue Neoplasm                                 | Missing an IS-A link to the concept Benign Soft Tissue Neoplasm                              |
| Colorectal Carcinoma by AJCC v7 Stage                            | Missing the role Disease_Excludes_Finding with the target Favorable Clinical Outcome         |
| Colorectal Signet Ring Cell Carcinoma                            | Missing the role Disease_Excludes_Finding with the target Favorable Clinical Outcome         |

| <b>NCIt Neoplasm Concept</b>                     | <b>Error</b>                                                                                  |
|--------------------------------------------------|-----------------------------------------------------------------------------------------------|
| Elastofibroma                                    | Missing the role Disease_Has_Primary_Anatomic_Site with the target Elastic Fiber              |
| Fibrous Hamartoma of Infancy                     | Missing the role Disease_Has_Finding with the target Dermal Involvement                       |
| Invasive Micropapillary Breast Carcinoma         | Missing the role Disease_Has_Finding with the target Aggressive Clinical Course               |
| Appendix Tubular Carcinoid                       | Missing the role Disease_Has_Normal_Tissue_Origin with the target Neuroendocrine Tissue       |
| Benign Cerebellar Neoplasm                       | Missing the role Disease_Has_Finding with the target Benign Cellular Infiltrate               |
| Benign Cerebral Neoplasm                         | Missing the role Disease_Has_Finding with the target Benign Cellular Infiltrate               |
| Benign Skeletal Muscle Neoplasm                  | Missing the role Disease_Has_Associated_Anatomic_Site with the target Skeletal Muscle Tissue  |
| Benign Supratentorial Neoplasm                   | Missing the role Disease_Excludes_Primary_Anatomic_Site with the target Infratentorial Brain  |
| Bone Marrow Neoplasm                             | Missing the role Disease_Has_Primary_Anatomic_Site with the target Bone Marrow                |
| Clear Cell Adenoma                               | Missing the role Disease_Excludes_Abnormal_Cell with the target Malignant Cell                |
| Intraductal Papilloma                            | Missing the role Disease_Excludes_Finding with the target concept Invasive Lesion             |
| Malignant Childhood Hemangiopericytoma           | Missing the role Disease_Has_associated_Anatomic_Site with the target concept Vascular System |
| Malignant Esophageal Neoplasm by Anatomic Region | The semantic type Neoplastic Process is wrong                                                 |
| Acute Erythroid Leukemia                         | Missing the role Disease_Excludes_Primary_Anatomic_Site with the target Lymphatic System      |
| Acute Myelomonocytic Leukemia                    | Missing the role Disease_Excludes_Primary_Anatomic_Site with the target Lymphatic System      |
| Benign Fallopian Tube Neoplasm                   | Missing the role Disease_Has_Finding with the target Benign Cellular Infiltrate               |

| NCIt Neoplasm Concept                                           | Error                                                                                              |
|-----------------------------------------------------------------|----------------------------------------------------------------------------------------------------|
| Colon Adenocarcinoma                                            | Missing the role Disease_Has_Finding with the target Favorable Clinical Outcome                    |
| Colon Adenoma                                                   | Missing the role Disease_Has_Finding with the target Favorable Clinical Outcome                    |
| Colorectal Adenoma with Moderate Dysplasia                      | Missing the role Disease_Excludes_Abnormal_Cell with the target Malignant Cell                     |
| Colorectal Adenoma with Severe Dysplasia                        | Missing the role Disease_Excludes_Abnormal_Cell with the target Malignant Cell                     |
| Human Papillomavirus-Related Malignant Neoplasm in AIDS Patient | Missing the role Disease_Has_Associated_Disease with the target Acquired Immunodeficiency Syndrome |
| Intraductal Breast Neoplasm                                     | Missing the role Disease_Has_Finding with the target Intraductal Lesion                            |
| Iris Spindle Cell Melanoma                                      | Missing the role Disease_Has_Finding with the target Melanin Pigment Present                       |
| Lobular Neoplasia                                               | Missing an IS-A link to the concept Neoplasm, Uncertain Whether Benign or Malignant                |
| Intraventricular Brain Neoplasm                                 | Missing a child concept Glioblastoma                                                               |
| Gallbladder Mucinous Cystic Neoplasm                            | Missing the role Disease_Has_Primary_Anatomic_Site with the target Digestive System                |
| Gallbladder Sarcoma                                             | Missing the role Disease_Has_Primary_Anatomic_Site with the target Digestive System                |
| Adenocarcinoma with Spindle Cell Metaplasia                     | Missing the role Disease_Has_Abnormal_Cell with the target Malignant Spindle Cell                  |
| Combined Carcinoid and Adenocarcinoma                           | Missing an IS-A relationship to the concept Carcinoid tumor                                        |
| Malignant Endometrial Neoplasm                                  | Missing the role Disease_Excludes_Abnormal_Cell with the target Neoplastic Smooth Muscle Cell      |
| Reproductive Endocrine Neoplasm                                 | Missing an IS-A relationship to the concept Endocrine Neoplasm                                     |
| Tonsillar Carcinoma                                             | Missing the role Disease_Has_Associated_Anatomic_Site with the target Throat                       |
| Skull Neoplasm                                                  | Missing an IS-A relationship to the concept Bone Neoplasm                                          |
